# Supplementary material for: Level of anxiety and depression among healthcare workers in Saudi Arabia during the COVID-19 pandemic
Source: PeerJ. 2022 Dec 1;10:e14246. doi: 10.7717/peerj.14246 (PMC9744137; doi:10.7717/peerj.14246)
Supplement: Supplemental Information 1 — Socio-demographic profile, anxiety and depression scores. [file peerj-10-14246-s001.xlsx]

## Sheet: Data
Subjects	Age	gender	marital	ses	national	facility	profession	type_hos	area	exprince	covid_1	covid_1_5_TEXT	covid_2	covid_3	Anxiety_1	Anxiety_2	Anxiety_3	Anxiety_4	Anxiety_5	Anxiety_6	Anxiety_7	Dprsn_1	Dprsn_2	Dprsn_3	Dprsn_4	Dprsn_5	Dprsn_6	Dprsn_7	Dprsn_8	Dprsn_9	Dprsn_10	Dprsn_11	Dprsn_12	Dprsn_13	Dprsn_14	Dprsn_15	Dprsn_16	Dprsn_17	Dprsn_18	Dprsn_19	Dprsn_20	email	Anxiety_cats	Dprsn_cats	Anxiety_total	Dprsn_total	Adjusted_z	chi_sqaure	p_value
1	28	2	1	2	1	1	4	3	4	5	1		0		3	3	3	3	2	3	3	3	3	4	4	2	0	2	2	1	4	4	4	1	4	4	4	4	4	1	4	2	3	1	20	59	2.58	6.6564	0.00988003
2	33	1	3	3	1	2	1	2	5	10	1		0		0	0	1	0	0	1	1	1	4	1	1	1	1	1	1	1	1	2	4	1	2	1	2	3	3	1	1	1	0	0	3	33	-1.28	1.6384	0.200545
3	27	1	3	2	1	1	1	2	1	4	3		5	2	1	1	1	1	0	1	1	1	2	1	1	4	1	1	1	1	1	2	2	1	2	1	2	1	2	1	2	2	1	0	6	30	-2.18	4.7524	0.0292575
4	26	1	1	2	1	1	3	3	2	3	3		10	2	1	1	1	2	1	1	2	2	1	2	2	3	0	1	1	2	1	3	3	2	3	2	3	2	3	1	3	2	1	0	9	40	1.03	1.0609	0.30301
5	34	2	4	2	1	1	3	3	5	11	1		0		1	1	1	1	0	1	0	2	4	2	1	4	0	1	1	1	2	4	4	2	3	2	3	2	3	1	4	2	1	0	5	46	2.83	8.0089	0.0046548
6	27	2	1	3	1	1	4	5	4	7	1		0		0	0	0	0	0	0	0	1	4	1	1	1	0	1	1	1	1	1	1	1	1	1	1	2	3	1	1	1	0	0	0	25	-0.5	0.25	0.617075
7	26	2	1	3	1	1	2	3	5	3	1		0		3	1	3	3	3	1	1	4	2	2	1	4	0	4	1	2	4	4	4	4	1	4	2	3	3	1	3	2	3	1	15	53	-1.93	3.7249	0.0536068
8	24	2	1	2	1	1	5	1	5	2	5	Radiology, medical imaging	1	3	1	2	2	1	0	2	1	1	1	2	1	4	0	1	1	2	1	2	3	1	4	2	4	3	3	1	3	1	1	0	9	40	1.52	2.3104	0.128511
9	30	1	3	3	1	1	1	1	5	6	1		0		1	1	1	1	0	1	1	1	2	1	2	3	4	1	1	2	3	4	4	2	1	1	4	2	1	1	4	2	1	0	6	44	0.4	0.16	0.689157
10	32	2	4	2	1	1	5	3	2	8	1		0		1	1	1	1	0	1	1	3	3	2	1	4	0	1	1	1	2	4	4	1	3	3	4	2	3	1	3	1	1	0	6	46	0.24	0.0576	0.81033
11	24	2	1	3	1	1	2	2	3	2	4		1	1	1	0	1	0	0	0	1	1	4	1	2	3	0	2	2	1	1	3	3	2	3	1	1	4	2	1	2	1	0	0	3	39	-0.99	0.9801	0.322174
12	26	2	1	3	1	1	5	3	1	4	5	Iâ€™m a dietitian, so planning tube feeding to meet patients nutritional requirements	3	2	1	1	1	1	0	1	0	3	2	2	1	1	0	1	2	1	2	3	3	1	1	1	1	1	2	1	1	2	1	0	5	30	0.13	0.0169	0.896566
13	25	2	1	4	1	1	1	2	2	2	1		0		0	0	1	1	0	0	0	1	2	1	1	1	0	1	2	1	1	1	1	1	1	1	4	3	1	1	1	1	0	0	2	26	-0.02	0.0004	0.984043
14	40	1	3	4	1	1	1	3	5	17	1		0		2	0	3	3	0	1	1	2	4	1	4	3	4	4	1	1	2	4	4	2	3	3	3	1	4	1	4	2	2	1	10	55	0.78	0.6084	0.435391
15	29	2	3	3	1	1	1	2	5	4	5	Radiological diagnosis	3	2	1	0	1	1	1	1	0	2	3	1	1	4	3	1	1	1	2	4	4	3	2	3	2	3	3	1	3	1	1	0	5	47	-0.39	0.1521	0.696537
16	27	2	3	2	1	2	5	1	5	5	1		0		2	1	2	1	1	1	3	2	3	2	4	4	0	2	2	2	2	3	3	2	3	3	4	4	2	1	2	1	2	1	11	50	-0.89	0.7921	0.373466
17	26	2	1	3	1	1	5	2	2	5	1		0		2	1	1	1	0	0	0	1	1	1	1	1	0	1	1	1	1	4	2	1	3	1	3	4	2	1	2	1	1	0	5	32	-0.85	0.7225	0.395325
18	31	2	3	3	1	1	5	1	2	7	5	Our patients diagnose with it	3	1	3	2	3	3	3	3	1	1	1	2	4	4	4	4	1	1	1	2	1	2	1	1	2	1	1	1	1	1	3	0	18	36	0.25	0.0625	0.802587
19	33	1	1	3	1	1	4	5	4	11	2		2	1	0	0	0	0	0	0	0	1	1	1	1	3	1	1	1	1	1	1	2	1	2	1	2	2	1	1	1	1	0	0	0	26	-0.56	0.3136	0.575479
20	38	2	1	2	1	1	2	2	5	11	1		0		1	1	1	1	0	1	1	2	4	2	2	4	0	1	1	1	1	3	3	1	2	1	2	2	3	1	3	1	1	0	6	39	-1.44	2.0736	0.149867
21	33	2	3	3	1	1	1	2	5	8	1		0		2	1	1	1	1	3	1	4	1	2	2	4	4	4	3	3	2	4	4	3	4	3	2	4	4	1	4	2	2	2	10	62	2.8	7.84	0.00511026
22	24	2	1	4	1	1	2	4	5	3	4		2	1	1	1	1	1	1	1	1	1	3	1	2	2	0	1	3	3	2	3	3	2	3	2	3	2	3	1	3	2	1	0	7	43	-0.75	0.5625	0.453255
23	29	2	1	2	1	1	1	2	5	5	1		0		1	1	1	2	2	3	1	3	3	3	4	1	0	1	3	2	3	4	4	2	4	3	4	3	4	3	4	1	2	1	11	58	-1.38	1.9044	0.167587
24	25	2	4	3	1	1	2	3	2	2	1		0		1	0	1	1	1	1	1	2	3	2	2	1	0	2	4	3	4	4	3	2	4	4	4	4	4	4	3	1	1	1	6	59	0.2	0.04	0.841481
25	26	2	1	2	1	1	4	3	4	5	2		1	2	3	3	3	3	3	3	3	4	3	4	4	4	4	4	2	3	4	4	3	4	3	4	4	4	4	4	4	1	3	3	21	74
26	24	1	1	3	1	1	5	2	3	3	3		2	2	1	1	0	2	2	1	1	1	2	1	4	2	0	1	1	2	1	2	2	2	2	1	2	1	3	1	2	1	1	0	8	33
27	33	2	1	3	1	1	4	3	4	11	1		0		3	3	3	2	1	2	3	2	3	1	2	2	0	1	4	1	3	3	3	2	4	3	2	4	4	3	4	2	3	1	17	51
28	26	2	1	2	1	1	1	2	1	1	1		0		1	0	1	0	0	2	1	2	3	2	1	4	0	1	1	1	1	4	3	1	4	2	4	3	4	1	4	1	1	0	5	46
29	42	1	3	2	1	1	3	6	5	20	5	In command & control center of COVID 19	40	2	0	0	0	1	1	0	0	1	2	1	4	4	2	1	2	1	1	3	2	1	1	1	3	1	3	1	4	1	0	0	2	39
30	39	1	3	4	1	1	1	3	2	15	1		0		1	1	1	1	1	1	1	2	3	1	2	4	1	1	1	1	1	3	3	1	2	1	1	1	1	1	1	2	1	0	7	32
31	25	2	1	3	1	1	2	3	2	2	4		2	1	1	1	2	3	1	0	0	1	3	2	3	4	0	4	1	3	2	4	3	3	2	1	1	1	3	1	3	2	1	0	8	45
32	27	2	3	2	1	1	5	2	5	6	5	Doing ultrasound scan for them if its need	1	1	2	1	2	3	1	2	1	2	3	4	3	3	3	1	1	1	2	3	4	2	2	3	3	2	2	1	2	1	2	0	12	47
33	26	2	1	2	1	1	1	2	2	1	1		0		1	0	1	0	0	0	0	1	3	1	1	1	0	1	1	1	1	3	3	1	1	1	3	3	2	1	1	1	0	0	2	30
34	24	2	3	2	2	2	5	3	5	1	1		0		1	2	3	1	1	1	1	1	4	2	2	3	3	1	1	1	2	4	4	2	4	3	3	3	3	1	4	2	2	1	10	51
35	34	2	3	4	1	2	2	1	5	15	5	Participating in covid 19 swaping	4	1	1	2	3	2	1	2	3	2	3	1	1	1	3	1	1	1	1	4	4	3	3	3	4	1	3	1	1	2	2	0	14	42
36	29	1	3	2	1	1	3	2	5	5	3		3	3	0	0	0	0	0	0	0	1	3	1	1	1	2	1	1	1	1	2	2	1	2	1	3	1	2	1	2	1	0	0	0	30
37	26	2	1	3	1	1	4	1	4	3	1		0		0	0	1	1	1	1	1	1	2	1	2	2	0	1	1	2	3	3	3	2	2	1	4	3	4	2	3	1	1	0	5	42
38	32	2	1	3	1	1	4	2	4	7	2		10	1	2	1	1	1	1	1	1	2	3	1	2	4	0	1	2	1	2	3	3	2	2	1	3	2	2	1	3	1	1	0	8	40
39	33	2	3	2	1	1	2	2	5	14	1		0		3	3	3	3	2	3	3	3	4	3	4	3	4	2	1	1	3	4	4	4	4	3	4	4	4	1	4	1	3	2	20	64
40	27	2	3	2	1	1	1	2	5	2	1		0		1	1	1	1	1	1	2	2	3	2	1	1	3	2	2	1	2	3	3	2	4	3	2	3	4	1	4	1	1	0	8	48
41	28	2	3	2	1	2	3	2	2	3	3		2	1	3	3	3	3	2	3	3	2	4	1	1	4	4	2	2	2	4	4	4	2	3	4	4	2	4	1	3	1	3	1	20	57
42	27	2	1	3	1	1	1	2	2	3	1		0		1	1	2	1	0	1	0	1	4	2	1	1	0	3	1	1	3	2	2	1	2	2	1	3	2	1	2	1	1	0	6	35
43	27	1	2	3	1	1	5	1	5	2	1		0		1	1	1	1	1	0	1	3	4	1	3	3	0	1	4	3	4	4	4	1	3	1	3	3	2	1	4	1	1	1	6	52
44	24	1	1	2	1	1	5	1	5	2	2		1	2	0	0	0	1	0	0	1	1	3	1	1	1	0	1	1	1	2	3	3	1	1	1	3	2	3	1	2	1	0	0	2	32
45	30	1	1	4	1	1	1	3	2	7	2		4	2	2	1	1	2	0	1	1	1	4	1	2	1	0	1	1	1	2	3	3	1	2	2	2	2	2	1	1	2	1	0	8	33
46	26	2	3	3	1	1	5	2	2	3	1		0		3	2	3	2	3	2	1	3	4	2	3	3	0	2	3	4	1	3	4	4	2	4	4	3	2	1	3	1	3	1	16	55
47	24	2	1	3	1	1	2	3	3	2	1		0		1	1	1	1	0	0	0	1	2	1	1	4	0	1	1	1	1	2	3	1	1	1	2	2	2	3	2	1	0	0	4	32
48	31	1	3	2	1	1	1	1	5	4	2		4	2	2	1	1	1	1	1	0	2	1	1	2	1	4	1	1	2	4	3	4	2	3	3	3	1	2	1	4	2	1	0	7	45
49	29	1	1	2	1	1	1	2	2	5	2		1	2	1	0	1	0	0	0	0	1	2	1	3	1	0	1	1	1	1	3	4	1	2	1	3	3	3	1	3	1	0	0	2	36
50	30	1	3	2	1	2	3	6	3	5	1		0		1	1	0	1	1	0	0	1	4	1	1	1	2	1	1	1	4	3	4	2	4	1	1	2	2	1	3	1	0	0	4	40
51	33	2	2	2	2	2	2	2	2	4	1		0		3	1	1	1	0	1	0	1	4	1	1	2	0	1	3	2	1	2	2	1	2	1	3	2	2	1	2	1	1	0	7	34
52	25	2	1	1	1	1	5	6	5	2	3		2	3	3	3	3	2	2	1	2	3	3	3	4	3	0	1	2	3	4	4	4	2	3	3	4	4	3	1	3	2	3	1	16	57
53	27	2	3	2	1	2	5	3	2	5	1		0		2	1	1	1	1	2	1	1	2	1	1	2	3	1	1	1	2	3	2	1	4	3	4	4	3	1	2	1	1	0	9	42
54	24	2	1	2	1	2	5	6	5	2	5	Translation	9	2	1	1	1	3	1	1	1	2	3	1	1	3	0	1	1	1	2	4	4	1	1	2	4	1	1	1	4	1	1	0	9	38
55	26	1	1	3	1	1	2	3	2	1	4		17	1	1	1	1	0	0	0	2	1	2	1	1	3	0	1	2	1	1	4	4	2	4	1	2	3	2	1	2	1	1	0	5	38
56	30	2	4	3	1	1	5	2	1	5	5	Transfers or front disk triage	1	1	1	2	2	1	2	1	1	3	2	3	2	1	0	1	1	1	3	3	2	3	2	2	2	3	2	1	3	1	2	0	10	40
57	27	1	1	3	1	1	5	1	3	4	5	Respiratory Therapist	1	1	2	1	1	1	1	0	1	2	4	1	1	2	4	1	1	1	1	2	4	1	2	2	2	1	2	1	2	2	1	0	7	37
58	27	1	1	2	1	1	5	6	5	6	5	food service	20	1	3	3	3	3	3	3	3	4	4	4	4	4	4	1	4	2	4	4	4	4	4	4	3	1	2	3	4	1	3	2	21	68
59	26	2	1	2	1	2	5	3	5	4	1		0		2	2	3	1	1	2	3	2	2	3	2	3	0	3	2	2	2	4	3	3	1	3	4	3	3	1	3	1	2	0	14	49
60	29	2	1	2	1	1	4	5	4	5	1		0		0	0	0	0	0	1	0	1	1	1	1	3	0	1	1	1	1	3	2	1	3	1	3	3	3	1	2	1	0	0	1	33
61	26	1	1	2	1	1	1	1	5	2	2		1	1	1	1	1	0	0	1	0	1	2	1	1	1	0	1	2	1	1	2	2	1	1	1	2	1	3	1	3	1	0	0	4	28
62	31	2	3	3	1	1	2	2	5	13	5	Infection control	1	1	2	1	1	1	0	1	0	1	2	1	3	4	4	1	1	1	2	4	4	3	3	2	2	1	2	1	3	1	1	0	6	45
63	30	1	3	3	1	1	1	1	5	5	5	Quarantine physician + ER + family medicine clinic	7	1	0	0	1	1	1	0	0	1	4	1	2	1	1	1	1	2	1	2	2	1	2	2	1	1	2	1	1	2	0	0	3	30
64	30	1	3	2	1	1	2	2	2	1	1		0		3	3	1	1	3	1	2	2	3	1	1	3	0	1	1	1	1	4	1	2	1	1	3	1	2	2	3	2	2	0	14	34
65	29	1	3	2	1	1	1	3	2	7	3		7	3	1	1	1	0	1	1	2	2	2	1	1	4	3	1	1	1	3	3	4	2	4	1	4	4	4	2	3	2	1	1	7	50
66	25	2	1	4	1	1	1	3	2	2	5	Diagnosis and treatment	4	2	1	2	2	0	0	0	0	1	4	1	1	1	0	1	1	1	2	4	4	1	2	1	2	2	2	1	1	1	1	0	5	33
67	26	1	1	3	1	1	3	2	2	3	3		3	1	1	0	0	1	1	1	0	1	1	1	2	1	0	2	1	2	2	2	4	2	2	1	1	1	1	1	4	1	0	0	4	32
68	24	1	1	2	1	1	5	3	1	7	1		0		2	1	2	1	1	2	0	2	3	2	1	2	4	2	2	3	3	2	4	3	3	3	2	2	3	2	2	1	1	1	9	50
69	26	2	1	2	1	1	1	3	2	3	1		0		1	1	1	0	0	1	1	1	3	1	2	3	0	1	1	2	2	4	4	3	3	2	3	3	3	1	2	1	1	0	5	44
70	28	2	1	2	1	1	5	6	1	3	1		0		1	0	3	1	1	1	0	3	4	4	4	1	0	2	1	1	4	4	4	2	3	1	4	3	4	4	3	1	1	1	7	56
71	24	2	1	4	1	1	5	6	5	2	2		1	3	3	3	3	1	0	1	1	2	3	2	1	2	0	1	1	4	1	4	3	1	3	2	4	1	3	1	4	1	2	0	12	43
72	27	1	1	2	1	1	4	3	4	4	1		0		2	0	0	2	0	0	0	2	4	1	1	4	4	1	1	1	1	4	4	1	4	1	4	4	4	1	3	1	0	1	4	50
73	27	2	1	2	1	1	5	1	5	3	1		0		1	1	2	3	2	1	2	2	3	1	2	3	0	1	1	1	3	4	3	2	3	2	4	2	4	1	3	1	2	0	12	45
74	23	2	3	4	1	2	2	1	2	2	4		2	2	3	2	2	2	2	2	2	3	1	4	4	3	2	1	1	3	2	4	4	3	2	3	2	1	2	1	3	1	3	0	15	49
75	32	1	3	3	1	1	3	2	2	9	3		15	4	1	1	2	3	1	0	1	1	1	1	1	3	1	1	1	1	1	2	2	2	2	1	2	3	1	1	2	1	1	0	9	30
76	29	2	1	3	1	1	1	1	5	6	1		0		1	1	2	1	1	1	1	1	3	1	1	2	0	1	1	2	2	2	2	2	2	2	4	3	2	1	2	1	1	0	8	36
77	35	1	1	2	1	1	3	2	5	12	1		0		1	1	1	1	1	2	2	2	3	2	2	4	4	4	1	1	1	3	3	2	3	2	3	4	4	1	4	1	1	1	9	53
78	24	1	1	3	1	1	2	1	2	2	4		2	1	1	0	2	2	0	1	2	3	3	2	2	2	2	3	2	2	2	1	3	2	3	2	2	2	3	2	3	1	1	0	8	46
79	25	2	1	3	1	1	2	1	3	2	1		0		0	0	1	0	0	0	0	1	3	1	2	3	0	1	2	1	1	2	3	1	3	1	2	2	3	2	4	1	0	0	1	38
80	30	2	3	4	1	1	2	3	3	8	4		2	2	3	2	3	3	1	3	3	3	3	4	2	3	3	2	3	2	4	4	4	3	2	4	4	1	2	1	2	1	3	1	18	56
81	25	2	1	3	1	1	5	2	1	3	2		6	1	2	1	2	1	0	0	0	1	2	1	2	4	0	1	1	2	3	4	3	1	2	1	4	1	2	1	2	2	1	0	6	38
82	28	2	4	2	1	1	2	3	5	4	1		0		1	0	1	1	1	1	0	2	4	1	2	4	0	2	2	4	2	3	4	2	2	3	1	2	2	2	3	2	1	0	5	47
83	42	1	3	3	1	1	4	2	4	13	1		0		1	0	0	0	0	1	0	1	2	1	1	1	1	1	1	2	1	1	1	1	1	2	2	1	1	1	1	1	0	0	2	24
84	26	2	4	2	1	1	2	1	3	3	4		1	3	1	0	1	1	1	1	1	2	3	2	4	3	0	4	1	4	4	3	3	2	2	2	4	3	3	1	2	1	1	1	6	52
85	35	2	3	2	1	1	2	2	5	7	4		25	1	3	1	2	2	1	0	1	1	3	1	2	2	3	1	1	1	1	4	4	1	4	1	4	4	4	1	2	2	2	0	10	45
86	26	2	1	2	1	1	5	2	5	2	1		0		1	2	1	2	0	0	3	4	2	1	1	2	0	1	2	1	1	2	1	1	1	1	2	4	4	1	1	1	1	0	9	33
87	27	2	1	2	1	1	1	2	1	4	2		1	1	2	1	3	2	1	2	3	2	4	3	3	2	0	1	2	3	2	4	4	3	2	3	3	3	3	1	2	1	2	1	14	50
88	31	2	1	3	1	2	5	1	2	10	3		12	1	1	2	3	1	3	3	3	2	1	2	1	1	0	4	1	2	4	4	3	4	1	2	4	1	1	1	4	2	3	0	16	43
89	29	1	1	3	1	1	5	1	1	3	3		20	3	1	1	1	1	1	1	0	1	1	1	2	4	0	4	1	1	2	3	3	2	1	1	1	1	1	1	1	2	1	0	6	32
90	46	2	4	4	1	1	1	3	2	21	1		0		3	3	3	3	2	2	3	3	4	3	4	1	4	1	4	2	4	4	3	4	3	3	4	1	1	1	3	2	3	1	19	57
91	29	2	3	3	1	1	1	3	2	6	1		0		1	0	1	1	0	1	0	1	1	1	1	3	3	1	1	1	1	3	1	1	4	2	4	4	1	1	3	1	0	0	4	38
92	27	2	3	3	1	1	1	4	5	4	1		0		1	1	1	0	0	1	0	1	2	1	1	1	1	1	1	1	1	2	4	1	3	1	3	3	3	1	1	1	0	0	4	33
93	31	2	1	2	1	1	3	3	2	9	3		20	3	3	3	3	3	3	3	3	4	3	4	4	4	0	1	2	3	4	4	4	4	4	4	4	3	1	3	4	2	3	2	21	64
94	31	1	3	4	1	1	1	1	5	9	1		0		1	0	0	0	0	1	1	1	1	1	1	4	1	2	1	2	2	2	1	1	1	1	2	2	2	1	1	1	0	0	3	30
95	26	1	1	4	1	1	4	3	4	4	2		4	3	1	3	3	2	1	3	3	2	2	1	1	3	0	3	3	3	3	4	4	4	2	3	4	3	4	3	3	1	3	1	16	55
96	27	1	1	4	1	1	1	2	1	2	2		1	1	1	0	1	1	0	1	1	2	4	1	3	1	0	1	1	1	4	2	1	1	3	1	3	3	3	1	2	1	1	0	5	38
97	45	1	3	4	1	2	1	2	1	21	2		7	3	1	1	1	1	1	1	1	1	3	1	2	2	2	1	1	1	2	1	3	2	1	2	1	1	1	1	1	1	1	0	7	30
98	27	1	1	3	1	1	1	2	2	3	1		0		0	0	1	1	1	0	1	1	3	1	1	1	0	1	1	1	1	2	2	1	3	1	1	2	1	1	1	1	0	0	4	26
99	25	2	1	2	1	2	5	3	5	2	1		0		3	3	3	3	2	2	3	2	4	2	4	3	0	1	1	3	4	4	4	3	1	3	4	3	2	1	2	1	3	1	19	51
100	32	1	3	2	1	1	5	3	1	8	2		15	1	1	1	1	1	1	1	1	1	4	1	4	4	4	2	2	2	2	4	4	2	4	2	4	4	4	1	4	1	1	1	7	59
101	34	1	3	3	1	1	2	2	3	7	1		0		2	0	2	0	2	2	2	1	2	1	2	3	0	1	1	1	1	3	3	1	2	2	3	2	2	1	2	1	2	0	10	34
102	36	2	3	2	1	1	4	5	4	13	5	handling with sample for patient who diagnosis or suspect for covid-19	30	2	2	1	1	1	0	1	1	1	1	2	2	4	2	1	1	1	2	4	3	2	1	2	1	1	1	1	3	2	1	0	7	36
103	31	1	3	4	1	1	1	3	5	6	1		0		0	0	1	0	0	0	1	1	1	1	1	1	1	1	1	1	1	1	1	4	1	1	2	1	1	1	1	1	0	0	2	24
104	40	1	3	3	1	1	1	3	5	17	5	Dental emergency for suspected COVID-19 patients	2	1	0	1	0	0	0	1	0	1	3	1	1	4	1	1	2	1	1	3	3	1	2	3	3	3	3	1	3	1	0	0	2	41
105	28	2	1	3	1	1	4	3	4	5	1		0		1	1	1	0	0	1	1	3	4	2	3	2	0	1	1	1	1	3	3	1	4	1	4	3	2	1	3	1	1	0	5	43
106	30	2	1	3	1	1	3	3	5	5	3		2	2	1	1	2	1	1	1	3	2	3	1	1	4	0	1	1	1	2	4	4	1	2	3	3	1	2	1	3	1	2	0	10	40
107	30	1	3	2	1	1	1	2	2	5	1		0		2	2	1	1	1	1	2	2	2	1	1	1	2	1	1	2	3	4	4	3	3	3	4	2	4	1	3	1	2	0	10	47
108	36	1	3	4	1	1	1	2	5	10	2		3	1	1	1	1	1	0	1	0	1	4	1	1	3	4	2	1	1	1	2	1	1	2	2	2	1	1	1	1	1	1	0	5	33
109	25	2	1	3	1	2	3	2	5	2	3		3	2	1	1	1	1	1	2	2	2	3	1	2	1	0	1	1	1	3	3	4	2	3	2	4	4	3	2	4	2	1	0	9	46
110	28	2	1	3	1	1	3	2	5	4	1		0		1	1	1	1	1	1	1	1	4	2	1	3	0	1	1	2	2	4	4	2	4	2	4	2	4	1	4	1	1	0	7	48
111	30	2	1	3	1	1	3	3	5	4	3		28	2	2	1	3	0	1	2	0	3	3	1	2	3	4	1	4	4	3	3	2	3	1	2	3	2	3	2	2	2	1	1	9	51
112	31	2	1	3	1	1	5	1	2	9	1		0		1	0	1	1	0	1	0	1	2	1	2	1	0	1	1	1	1	3	3	1	1	2	2	2	2	1	2	1	0	0	4	30
113	30	2	3	2	1	1	2	3	2	7	1		0		3	2	3	2	2	3	1	3	3	4	2	1	4	1	1	2	3	4	2	1	2	4	4	4	3	1	2	1	3	1	16	51
114	29	2	4	3	1	1	4	5	4	3	1		0		1	1	1	1	1	0	1	1	1	1	2	3	0	3	2	1	1	1	3	1	2	1	4	4	3	1	2	2	1	0	6	37
115	24	2	1	2	1	2	3	6	5	2	1		0		1	0	3	1	0	1	2	3	1	3	1	3	0	1	1	1	3	4	3	1	2	2	3	4	4	2	3	1	1	0	8	45
116	24	1	1	4	1	1	2	2	1	1	5	Triage respiratory and observation	4	1	0	0	0	0	0	0	0	1	4	1	3	2	0	1	1	1	1	1	2	1	2	1	2	1	1	1	1	1	0	0	0	28
117	27	2	1	2	1	1	2	2	1	5	4		3	1	1	2	1	1	1	2	2	2	3	2	2	3	0	1	2	1	4	4	4	2	2	3	2	1	3	1	2	2	2	0	10	44
118	26	2	3	3	1	1	1	2	2	4	2		1	1	1	0	1	1	0	1	1	1	2	1	1	4	2	1	1	1	2	3	2	1	1	1	3	1	3	1	2	1	1	0	5	34
119	25	2	1	4	1	1	5	6	5	3	3		4	3	1	1	2	2	1	2	2	1	4	3	4	2	0	2	4	3	2	4	4	1	3	2	2	1	1	1	3	1	2	0	11	47
120	29	2	1	4	1	1	1	2	2	6	1		0		3	3	3	3	2	2	3	4	2	2	4	3	0	1	2	4	1	3	3	3	2	4	2	2	2	1	3	1	3	0	19	48
121	26	2	1	2	1	1	1	2	1	1	2		4	1	2	1	1	1	0	1	1	2	2	1	1	2	0	1	2	1	1	3	3	1	2	2	3	1	3	1	3	1	1	0	7	35
122	31	2	1	4	1	1	5	3	3	9	5	Nutrition - tube feeding	2	2	2	2	2	1	2	3	3	3	1	3	4	4	0	4	1	4	2	4	2	2	3	4	4	2	2	1	3	1	3	1	15	53
123	29	1	3	2	1	1	1	2	2	4	1		0		0	0	0	1	0	1	1	1	1	1	2	1	3	1	1	2	1	2	3	2	2	2	2	3	3	2	3	2	0	0	3	38
124	28	2	1	2	1	1	2	1	2	4	1		0		1	1	3	2	1	1	2	1	4	2	1	3	0	2	2	4	1	4	3	1	2	2	4	1	2	1	2	1	2	0	11	42
125	26	2	1	3	1	1	1	2	2	2	5	Swabs taking for suspected/ or symptomatic patients	10	1	2	1	1	1	0	1	1	1	3	1	1	1	0	1	2	2	1	4	3	1	4	2	4	4	4	1	4	1	1	0	7	44
126	26	1	1	3	1	1	5	2	5	3	1		0		0	0	0	0	1	0	1	1	3	1	4	4	0	2	2	1	2	3	3	1	1	1	3	2	2	1	2	2	0	0	2	39
127	27	2	1	3	1	1	1	2	2	2	3		1	1	2	1	1	1	1	2	1	4	3	2	2	2	1	3	2	3	4	4	4	2	4	3	4	3	4	1	4	1	1	1	9	59
128	28	2	1	3	1	1	1	3	2	4	1		0		1	1	1	0	0	1	1	3	1	1	4	3	0	1	1	1	1	2	2	1	2	2	2	1	2	1	2	1	1	0	5	33
129	28	1	2	2	1	1	1	3	2	6	5	Assessment of all suspected cases, admitting them, diagnosis and treatment	20	3	1	1	1	0	0	2	2	1	4	1	2	4	0	1	1	1	4	3	3	2	2	2	2	1	2	1	2	2	1	0	7	39
130	26	2	1	3	1	1	1	2	2	3	2		2	2	1	1	3	2	1	1	0	3	3	2	3	4	0	3	2	2	1	2	2	2	4	2	2	4	3	1	3	1	1	0	9	48
131	25	1	1	2	1	1	2	2	3	1	4		1	1	1	0	1	0	0	0	1	1	2	1	1	3	0	1	1	1	1	3	2	1	2	1	2	2	1	1	1	1	0	0	3	28
132	32	2	1	2	1	1	1	2	2	8	1		0		2	1	1	1	1	1	1	2	3	2	1	2	0	1	1	1	2	4	4	3	3	2	3	3	3	1	3	1	1	0	8	44
133	29	2	1	3	1	1	1	6	5	3	1		0		1	1	1	1	0	1	1	2	2	2	2	3	0	1	1	2	2	3	4	1	3	2	4	4	4	1	4	1	1	0	6	47
134	29	2	1	3	1	1	1	2	2	5	3		1	2	3	2	3	2	1	0	2	2	3	2	4	2	0	3	3	2	4	2	2	2	2	4	2	1	3	2	3	1	2	0	13	48
135	26	2	1	3	1	1	1	2	1	2	1		0		1	1	1	2	1	3	1	2	3	1	1	2	3	2	1	3	3	4	4	2	3	4	3	3	2	1	4	1	2	1	10	51
136	25	2	3	4	1	1	1	2	2	2	1		0		3	2	0	0	0	0	0	1	4	1	1	1	1	1	3	1	2	3	1	1	2	2	2	2	1	1	1	1	1	0	5	32
137	34	1	3	3	1	1	1	3	1	7	5	triaging, suspicion, diagnosis & treatment with also transportation to other healthcare facility	10	2	3	3	3	3	2	3	3	3	3	1	4	1	3	1	2	2	2	4	4	3	2	4	3	1	1	1	3	1	3	0	20	48
138	26	2	1	2	1	2	5	4	5	4	1		0		1	1	2	1	1	1	1	1	1	1	2	2	0	1	1	2	1	3	3	1	2	2	3	2	2	1	2	2	1	0	8	33
139	27	1	1	2	1	1	5	3	1	6	2		8	2	1	1	1	1	1	0	0	1	2	1	3	3	4	1	1	4	2	3	4	1	4	2	1	3	2	1	2	2	1	0	5	45
140	38	2	3	3	1	1	5	2	5	14	2		10	3	1	1	1	1	1	2	2	1	1	1	1	4	4	4	2	1	2	2	3	1	1	2	2	1	1	1	3	1	1	0	9	38
141	29	2	3	3	1	1	3	2	5	6	1		0		3	3	3	3	2	3	2	4	2	2	1	3	3	1	1	1	2	4	1	4	1	4	3	1	1	1	3	1	3	0	19	43
142	27	1	3	3	1	1	1	2	1	3	3		8	4	2	1	2	3	0	2	1	1	4	3	4	4	3	2	1	1	2	4	4	1	3	3	3	2	4	1	3	2	2	1	11	53
143	24	2	1	4	1	1	2	3	4	2	1		0		1	1	2	1	0	1	1	1	2	2	1	3	0	1	1	1	2	3	3	1	2	2	3	2	3	3	3	1	1	0	7	39
144	25	1	1	2	1	1	4	1	4	3	1		0		1	1	1	1	1	1	1	2	4	2	2	4	0	1	1	1	2	3	4	1	3	3	3	2	3	1	4	1	1	0	7	46
145	42	2	3	3	1	1	4	5	4	19	1		0		1	1	1	1	0	1	1	1	1	1	1	1	4	1	4	3	3	2	2	1	1	1	3	1	1	1	1	2	1	0	6	34
146	37	1	3	3	1	1	2	1	5	18	4		1	1	1	1	1	1	1	1	1	1	3	2	3	3	0	2	1	4	4	1	1	4	4	3	4	4	4	1	3	1	1	1	7	52
147	23	2	1	2	1	1	5	1	2	2	1		0		1	0	0	1	0	1	1	1	1	1	1	1	0	1	1	2	1	1	3	1	2	2	3	3	2	1	1	1	0	0	4	29
148	34	2	3	3	1	1	5	3	2	12	1		0		1	1	1	1	1	1	1	2	3	2	2	4	4	1	2	2	2	2	4	1	2	1	3	3	2	1	2	1	1	0	7	45
149	35	1	3	2	1	1	2	2	3	2	4		4	2	2	1	1	0	1	1	0	2	4	1	1	4	3	1	1	1	2	4	4	2	2	1	2	2	4	2	4	2	1	0	6	47
150	26	2	1	2	1	2	1	3	5	3	1		0		1	1	1	1	0	2	0	1	4	1	1	2	0	1	1	1	2	4	3	1	4	2	2	2	3	1	3	1	1	0	6	39
151	24	2	1	1	1	1	1	1	2	2	5	Work in near the area of isolation	1	1	2	1	3	1	0	1	1	4	4	4	3	4	0	4	4	1	4	4	4	4	4	4	4	4	4	3	4	1	1	3	9	71
152	34	2	3	3	1	1	4	3	4	9	1		0		3	3	3	2	1	1	1	1	4	4	4	4	3	3	1	1	3	4	4	2	2	4	3	1	2	1	3	1	2	1	14	54
153	22	2	1	3	1	1	4	3	4	1	1		0		1	0	1	0	0	1	1	1	4	1	4	4	0	3	1	1	1	3	2	2	1	1	3	1	3	1	4	2	0	0	4	41
154	26	2	1	3	1	1	1	2	1	2	1		0		1	1	1	1	0	2	1	2	4	1	2	4	0	4	1	3	2	3	3	1	4	2	4	3	3	1	3	2	1	1	7	50
155	26	2	1	2	1	1	1	2	1	4	2		3	1	1	1	1	1	0	0	1	2	4	2	2	3	0	1	1	1	2	4	4	2	4	2	4	4	4	1	4	1	1	1	5	51
156	39	1	3	2	1	1	2	2	3	2	4		2	2	3	2	3	2	2	2	3	1	3	2	4	2	2	1	1	3	3	4	2	3	4	4	3	1	2	3	2	2	3	1	17	50
157	27	1	1	1	1	1	2	3	5	2	1		0		2	1	2	1	2	2	1	1	1	1	2	2	2	1	4	1	1	4	2	3	3	1	2	3	2	1	3	2	2	0	11	40
158	38	1	3	2	1	1	5	3	5	6	1		0		1	1	1	0	1	1	1	1	3	1	1	1	3	2	1	1	1	1	3	1	2	1	3	3	3	1	3	1	1	0	6	36
159	33	2	4	3	1	1	3	1	5	11	3		5	2	1	1	2	1	1	1	2	2	2	1	2	3	0	1	3	1	3	3	3	3	4	3	3	3	3	2	2	2	1	0	9	47
160	37	2	3	2	1	1	2	3	5	11	1		0		3	3	3	3	3	3	3	3	4	2	2	3	4	1	3	4	4	4	4	4	4	4	4	1	3	1	4	2	3	2	21	63
161	34	2	3	2	1	1	5	6	1	14	5	X-ray	5	1	2	0	1	1	1	2	2	1	1	1	2	3	0	3	2	1	3	4	3	2	2	2	3	2	3	1	3	2	1	0	9	42
162	24	2	3	2	1	2	4	2	4	1	5	Receiving COVID-19 samples and shipping them to the reference lab	4	1	1	1	1	0	0	1	0	1	3	2	1	1	2	1	1	1	1	3	3	1	4	1	4	4	3	4	4	2	0	0	4	45
163	27	1	3	3	1	1	3	2	5	4	1		0		1	0	1	1	0	1	0	1	3	2	1	1	1	1	2	1	1	4	3	2	2	2	3	2	3	1	3	1	0	0	4	39
164	29	2	3	3	1	1	1	2	2	4	1		0		1	0	1	0	0	1	1	1	2	1	1	1	1	1	1	1	2	2	1	1	2	1	2	3	1	1	1	1	0	0	4	27
165	26	1	1	1	1	1	1	2	1	3	1		0		1	1	1	1	0	1	1	1	4	1	1	2	0	1	1	1	1	3	4	1	2	1	2	2	2	1	3	1	1	0	6	34
166	32	2	3	4	1	1	5	6	5	10	2		1	1	1	0	1	1	1	2	1	1	2	1	2	2	0	1	2	2	4	3	3	2	2	2	3	2	2	1	2	2	1	0	7	39
167	39	2	3	2	1	1	5	2	5	14	1		0		3	3	3	3	3	3	3	4	4	2	4	1	3	1	1	4	4	4	4	4	4	4	4	3	4	1	4	2	3	2	21	64
168	32	2	3	3	1	1	1	2	2	3	3		3	1	3	1	1	1	1	3	2	2	3	2	2	3	3	1	4	2	4	3	2	3	3	3	3	2	1	1	3	1	2	1	12	50
169	34	2	1	3	1	1	2	3	5	6	1		0		2	0	2	2	2	2	2	1	3	2	2	3	0	2	1	2	2	3	1	2	3	2	3	3	3	2	3	2	2	0	12	43
170	28	2	1	3	1	1	1	1	5	4	1		0		1	1	1	1	1	2	1	2	2	1	1	2	0	1	1	1	2	2	2	1	2	3	3	3	3	1	3	1	1	0	8	36
171	30	2	3	3	1	1	1	2	2	3	1		0		0	0	1	0	0	0	0	2	2	1	1	4	1	1	1	1	1	2	2	1	1	1	2	1	1	1	2	1	0	0	1	29
172	31	1	3	4	1	1	5	1	5	8	1		0		1	0	0	0	0	0	0	1	4	1	1	4	3	1	1	1	1	1	1	2	1	1	1	1	1	2	1	1	0	0	1	30
173	28	1	1	2	1	1	1	2	5	2	2		2	1	0	0	1	0	0	0	0	1	4	1	1	4	0	1	1	1	1	4	4	1	4	1	4	4	4	1	4	2	0	0	1	46
174	29	2	3	2	1	1	1	2	1	4	2		8	1	1	0	1	1	0	1	0	1	4	1	2	1	2	2	2	3	2	4	2	1	2	3	3	2	2	1	2	1	0	0	4	42
175	26	2	3	3	1	1	1	2	2	3	1		0		3	3	3	2	1	2	2	3	2	2	2	1	2	1	3	3	3	4	3	2	3	2	3	4	3	2	4	1	3	1	16	52
176	43	2	4	2	1	1	2	3	3	19	2		13	1	0	0	1	2	0	0	0	2	3	1	4	4	4	1	1	1	1	3	2	2	3	1	4	4	4	1	4	1	0	1	3	50
177	32	2	3	3	1	1	1	1	5	9	2		2	1	0	0	0	0	0	0	0	1	4	1	1	1	1	1	1	1	1	1	1	1	1	1	1	2	2	1	1	2	0	0	0	25
178	34	1	3	3	1	1	4	5	4	12	1		0		0	0	1	0	1	1	0	1	2	1	1	4	1	1	1	1	1	3	4	1	1	1	2	2	2	1	2	1	0	0	3	33
179	33	2	1	3	1	1	1	6	5	9	5		3	1	1	1	1	0	0	0	0	1	2	1	1	4	0	1	1	1	1	3	3	1	1	1	1	2	1	1	1	2	0	0	3	28
180	30	2	3	2	1	1	2	2	1	11	4		3	1	3	3	2	2	1	1	1	4	3	2	3	2	4	1	2	2	3	2	3	2	3	3	3	2	3	1	4	2	2	1	13	52
181	27	1	1	3	1	1	5	1	5	3	1		0		0	1	1	1	1	1	1	3	1	1	2	2	0	1	2	2	2	2	2	2	2	2	1	1	3	1	2	1	1	0	6	34
182	36	1	3	2	1	1	5	6	1	14	5	X-ray	5	1	2	1	1	1	1	1	2	2	3	1	1	1	2	1	1	1	2	3	3	2	4	2	3	4	3	1	2	2	1	0	9	42
183	38	1	3	2	1	1	2	3	5	17	1		0		1	0	2	1	1	3	1	1	1	1	3	2	4	2	1	1	1	4	4	2	2	2	4	2	3	2	2	1	1	0	9	44
184	37	1	1	3	1	1	2	2	1	10	2		2	1	1	1	1	1	0	2	3	2	3	1	2	3	0	2	1	2	1	4	3	1	3	2	4	3	3	1	3	1	1	0	9	44
185	48	1	3	2	1	1	2	1	5	27	1		0		0	0	0	0	0	0	0	1	2	1	1	1	2	1	1	1	1	1	1	1	4	1	1	1	1	1	1	1	0	0	0	25
186	31	2	3	2	1	1	1	1	5	7	2		40	1	2	1	1	1	1	1	2	2	3	1	3	4	0	3	1	1	1	3	3	2	4	2	4	1	2	1	3	2	1	0	9	44
187	31	2	1	3	1	1	2	1	5	5	1		0		1	1	1	1	0	0	0	2	1	2	1	3	0	2	4	2	2	3	3	2	3	2	3	2	2	1	3	1	0	0	4	43
188	35	2	3	3	1	1	1	1	5	8	5	Suspected cases	1	1	3	1	3	3	1	3	2	4	3	3	3	2	1	2	2	2	4	3	1	3	3	4	3	3	3	2	3	2	3	1	16	54
189	27	2	1	3	1	1	1	2	2	4	1		0		1	0	0	1	0	1	0	1	2	2	2	2	0	1	1	1	2	4	3	1	2	1	4	3	3	1	4	2	0	0	3	40
190	27	2	1	2	2	2	5	6	5	3	1		0		0	0	0	0	0	1	0	1	3	1	1	4	1	1	3	1	1	4	4	1	1	1	2	2	2	1	1	1	0	0	1	36
191	35	2	3	2	1	1	2	1	5	12	1		0		1	1	1	1	1	1	1	1	3	1	2	4	3	1	1	1	2	4	4	1	3	1	3	4	3	1	3	2	1	0	7	46
192	37	1	3	2	1	1	5	2	5	14	5	I work in eye clinic (the eye has been considered as one of possible coronavirus transmitting media)	2	1	1	1	2	1	0	1	1	1	1	1	2	4	4	1	1	1	1	3	4	2	1	1	3	4	1	1	4	1	1	0	7	41
193	37	2	3	4	1	1	5	3	2	16	1		0		0	0	0	0	0	0	0	1	1	1	1	4	1	1	2	1	1	1	1	1	1	1	1	1	2	1	1	2	0	0	0	25
194	27	2	1	3	1	1	4	5	4	7	1		0		1	0	1	0	0	1	0	2	2	1	1	2	0	1	2	1	3	2	4	1	2	1	3	2	2	1	1	2	0	0	3	34
195	43	2	1	4	1	1	2	3	3	19	1		0		1	0	1	0	0	0	1	1	4	1	2	4	0	1	1	1	1	3	4	2	3	1	4	4	1	1	1	1	0	0	3	40
196	30	2	1	3	1	1	4	3	4	6	5	Provide and monitor POCT services in all hospital wards	1	1	1	1	2	1	1	2	1	2	2	1	2	4	0	1	3	1	1	4	4	1	2	2	4	3	3	1	2	1	1	0	9	43
197	35	1	3	2	1	1	1	2	5	8	1		0		2	1	1	1	0	1	2	2	4	2	3	3	4	3	1	1	3	3	3	2	2	2	1	1	2	1	3	2	1	0	8	46
198	30	2	3	2	1	2	5	6	5	13	5		1	3	0	2	0	1	0	1	2	1	3	1	2	4	4	2	3	4	3	2	3	4	1	4	2	2	3	2	2	2	1	1	6	52
199	25	2	1	3	1	1	5	1	5	2	2		6	1	1	3	2	2	1	2	0	2	4	2	2	4	0	1	1	1	3	4	4	2	3	2	3	4	3	1	4	1	2	1	11	50
200	40	1	1	3	1	1	5	5	4	13	2		40	3	1	1	2	1	1	1	2	1	2	1	4	3	0	3	1	3	3	3	3	2	2	3	4	1	4	1	3	2	1	0	9	47
201	32	1	4	2	1	1	1	6	5	6	5	Quarantine	40	1	1	0	3	1	1	1	0	1	1	1	1	2	1	1	1	1	2	4	3	4	1	2	1	2	2	1	2	2	1	0	7	34
202	25	2	1	3	1	1	5	2	2	1	1		0		0	0	0	1	0	1	0	1	2	1	1	3	4	1	1	1	1	3	3	1	1	1	2	1	2	1	1	1	0	0	2	32
203	36	2	3	2	1	1	2	2	3	18	1		0		1	0	1	1	1	1	1	1	4	1	2	3	4	1	2	1	1	3	4	2	4	2	3	3	3	1	3	2	1	0	6	48
204	45	1	3	4	1	1	1	6	5	16	4		4	2	2	1	1	3	2	3	3	3	3	1	2	4	1	1	1	1	1	4	4	3	3	3	4	4	4	4	3	2	3	1	15	54
205	35	1	3	4	1	1	5	1	5	10	5	Dentist, treatment of patient who might have COVID19	1	1	3	3	3	3	2	3	3	3	4	2	3	4	2	2	2	1	2	4	4	2	3	3	4	3	1	1	4	1	3	1	20	54
206	25	2	1	3	1	1	3	3	5	1	1		0		0	1	0	0	0	0	0	1	1	1	2	1	0	1	2	1	3	1	1	1	1	1	1	1	1	1	1	1	0	0	1	23
207	32	1	3	2	1	1	4	2	4	7	5	spacemens patient (sample)	10	2	3	0	0	1	0	1	0	1	4	2	2	4	4	1	1	1	2	1	3	1	3	1	2	2	2	2	4	2	1	0	5	43
208	28	2	3	1	1	1	2	3	1	6	1		0		3	3	3	2	2	2	3	3	2	3	4	3	0	3	2	2	1	4	3	2	2	3	2	2	1	1	2	2	3	0	18	45
209	22	2	1	3	2	1	2	3	2	4	2		2	1	1	1	2	2	1	1	0	2	4	3	4	4	0	1	1	1	4	4	4	2	1	2	4	1	3	1	3	1	1	0	8	49
210	48	1	3	4	1	1	1	2	5	21	1		0		0	0	0	0	0	0	0	1	3	1	1	1	1	1	1	1	1	1	1	1	1	1	1	1	1	1	1	1	0	0	0	22
211	30	2	1	2	1	1	2	1	5	11	4		1	1	1	1	2	1	3	1	0	1	1	2	4	4	4	1	2	4	2	4	3	4	2	1	3	1	4	1	2	2	1	1	9	50
212	40	2	3	2	2	1	2	2	1	15	4		25	1	2	2	0	2	0	0	2	2	1	1	1	4	0	1	1	1	1	1	1	1	1	1	1	1	1	1	1	2	1	0	8	23
213	28	2	1	3	1	1	3	1	5	6	5	I was suspicted to have came out negative	1	1	0	1	1	1	0	0	0	1	2	1	1	2	0	1	4	1	1	4	4	1	1	1	4	2	2	1	1	1	0	0	3	35
214	35	1	3	3	1	1	1	2	2	2	3		1	1	1	0	1	0	0	1	1	1	4	1	2	4	4	1	1	1	1	4	4	1	4	1	4	4	4	1	1	2	0	0	4	48
215	29	1	3	3	1	1	5	3	5	5	5	Epidemiologists	20	1	0	0	0	0	0	0	0	1	2	1	1	4	1	1	1	1	1	2	4	1	4	1	4	4	1	1	1	2	0	0	0	37
216	27	1	3	2	1	2	3	1	2	3	1		0		2	1	3	2	1	2	2	1	4	2	3	3	3	1	1	3	4	3	4	3	3	3	2	2	2	1	4	1	2	1	13	52
217	36	2	3	2	2	1	2	2	1	14	5	Triaging	17	2	3	0	1	2	2	0	0	2	3	2	1	4	0	1	1	1	3	2	2	3	2	2	3	1	1	2	3	1	1	0	8	39
218	29	2	3	2	1	1	2	1	5	4	1		0		1	1	1	1	1	1	1	1	1	1	1	1	1	1	1	1	2	4	2	2	3	4	3	1	1	1	1	1	1	0	7	33
219	47	2	3	2	1	1	2	3	5	26	1		0		0	0	1	0	0	0	0	1	4	1	1	3	1	2	2	2	2	3	3	1	3	2	3	1	1	1	1	2	0	0	1	38
220	26	2	3	3	1	2	2	6	5	2	1		0		1	0	0	0	0	0	1	1	3	2	4	3	4	1	3	3	2	3	3	1	1	1	3	3	2	1	2	2	0	0	2	46
221	27	2	3	3	1	1	1	1	5	4	1		0		1	1	0	0	0	1	1	1	1	3	1	3	2	1	1	3	2	4	3	1	3	1	3	3	2	1	2	1	0	0	4	41
222	33	1	3	1	1	1	5	3	1	9	2		35	4	1	1	3	3	3	3	3	4	4	2	4	3	4	1	4	2	4	1	4	4	4	4	4	4	1	4	4	2	3	2	17	66
223	28	2	1	2	1	1	1	1	5	4	2		15	2	1	1	2	2	2	0	0	4	3	2	3	3	0	1	4	3	4	3	4	3	4	1	2	4	2	1	3	2	1	1	8	54
224	25	1	2	3	1	1	1	2	2	2	3		11	3	0	1	1	1	0	1	1	1	4	1	1	1	4	1	1	1	1	3	4	1	2	2	3	2	2	1	3	2	1	0	5	39
225	39	1	3	3	1	1	3	3	5	18	5	Contact with nurses and doctors and dispense the med	2	1	1	1	1	0	0	1	1	1	4	1	1	3	1	1	1	1	2	4	3	1	2	1	2	3	3	1	1	1	1	0	5	37
226	28	1	1	3	1	1	4	5	4	4	2		8	2	2	2	1	1	2	1	2	1	1	1	1	2	4	3	1	1	1	1	1	1	4	1	1	1	3	1	1	1	2	0	11	31
227	31	1	4	3	1	1	2	1	1	14	5	Sort and take vital signs	8	2	0	0	0	0	0	0	0	1	1	1	1	2	0	1	1	1	1	4	4	1	4	1	4	4	2	1	1	2	0	0	0	36
228	28	1	3	3	1	1	1	2	2	5	1		0		1	1	1	1	0	1	0	1	2	1	1	2	1	1	1	1	2	3	3	2	2	2	3	2	2	1	2	2	1	0	5	35
229	28	1	3	2	1	1	1	2	1	2	1		0		1	1	1	1	0	1	2	1	1	1	2	2	2	1	3	1	1	4	3	1	2	2	3	2	2	1	1	2	1	0	7	36
230	40	2	3	2	1	1	2	1	1	16	5	...	5	2	1	1	1	1	0	1	1	1	2	1	1	3	3	1	1	1	1	4	3	1	1	1	2	2	2	2	3	1	1	0	6	36
231	26	1	1	3	1	1	1	2	1	1	1		0		0	0	1	1	0	1	2	1	4	1	1	3	0	1	1	1	1	3	3	1	3	2	4	1	3	1	3	2	1	0	5	38
232	30	1	2	2	1	1	2	3	1	6	4		2	1	3	1	1	2	1	2	1	2	3	1	4	4	3	2	2	2	3	2	3	2	3	1	4	2	2	3	2	1	2	1	11	50
233	28	2	1	3	1	1	3	3	5	5	1		0		1	2	1	1	0	1	1	2	3	1	1	4	0	1	1	1	2	2	3	1	2	2	3	2	2	1	2	1	1	0	7	36
234	24	2	1	3	1	1	1	2	2	1	1		0		1	1	2	1	0	1	1	1	1	2	1	1	0	1	1	1	2	2	3	1	1	1	4	3	3	1	3	2	1	0	7	33
235	28	1	3	2	1	1	5	6	5	7	5	E.M.S	40	3	0	0	0	0	3	2	1	1	4	1	4	2	0	1	1	1	2	1	3	2	2	1	3	3	3	1	4	2	1	0	6	40
236	24	2	1	2	1	2	4	5	4	2	2		3	2	1	0	1	0	1	0	1	1	1	2	1	3	0	3	1	1	1	3	3	2	2	3	3	1	2	1	1	2	0	0	4	35
237	30	2	1	2	1	1	5	1	2	8	1		0		0	0	0	0	0	0	0	1	1	1	1	2	0	1	1	1	2	1	1	1	1	1	1	1	2	1	2	1	0	0	0	23
238	43	2	1	3	1	1	2	3	5	16	1		0		3	1	1	1	1	1	1	2	2	2	1	4	0	1	1	3	3	3	2	3	2	2	4	3	3	1	4	1	1	0	9	46
239	27	2	4	4	1	1	2	1	1	5	4		1	1	1	2	2	2	1	2	1	2	2	1	1	3	0	2	3	3	3	4	3	2	2	3	3	2	3	1	3	1	2	0	11	46
240	42	2	3	2	2	1	2	2	1	21	4		20	2	0	0	0	0	0	0	0	1	4	1	2	3	3	1	1	1	1	3	4	1	4	2	4	1	1	2	3	1	0	0	0	43
241	32	1	1	3	1	1	4	5	4	12	5	Collecting samples	36	2	0	0	1	0	0	0	1	1	1	1	1	1	0	1	1	1	2	1	4	1	1	1	1	1	4	1	3	1	0	0	2	28
242	52	1	3	3	1	1	1	3	5	24	1		0		1	3	3	0	0	1	3	3	1	1	1	1	4	1	1	2	1	2	2	1	2	2	1	1	3	1	2	1	2	0	11	33
243	29	1	3	2	1	2	5	2	1	9	3		3	1	1	1	3	1	1	1	1	1	2	2	1	1	1	2	1	2	1	4	3	2	1	2	4	3	3	1	1	1	1	0	9	38
244	34	1	3	3	1	1	1	2	2	6	1		0		1	3	2	1	0	0	2	1	3	1	1	2	0	1	1	1	1	3	4	1	3	2	2	1	1	1	1	1	1	0	9	31
245	36	2	3	2	1	1	5	3	5	14	5	Patient experience	40	2	2	2	1	1	1	1	2	3	3	3	3	3	3	3	2	3	3	2	3	2	3	2	2	1	1	1	1	1	2	0	10	47
246	34	1	3	2	1	1	1	1	5	9	2		20	1	1	1	1	1	1	2	1	1	3	1	4	3	4	1	2	1	2	4	3	1	3	2	3	3	4	3	3	2	1	1	8	51
247	25	1	3	3	1	1	1	2	2	1	5	Diagnosis and treatment	30	4	3	3	3	2	1	1	3	3	3	3	1	1	1	1	1	2	3	4	4	3	3	3	3	1	2	1	3	1	3	0	16	46
248	32	1	3	1	1	1	2	1	1	11	4		13	2	2	3	2	2	2	2	3	2	4	2	3	2	1	3	2	1	2	4	1	2	3	2	3	1	1	1	3	1	3	0	16	43
249	34	1	3	2	1	1	1	2	2	6	5	Consultation for a non Covid19 related pathology	1	1	0	0	0	0	0	0	0	1	4	2	3	3	3	1	1	2	3	3	3	3	3	3	3	4	4	3	3	2	0	1	0	55
250	31	1	3	2	1	1	1	3	1	3	5	Both diagnosis and treatment	20	3	1	1	1	1	1	1	0	1	2	1	1	2	1	1	1	1	1	2	2	1	2	1	2	2	2	1	2	1	1	0	6	29
251	29	2	1	3	2	2	1	2	2	4	3		5	1	1	1	2	1	1	1	1	2	2	2	4	4	0	4	1	2	2	4	2	2	1	2	3	2	2	1	2	2	1	0	8	44
252	25	2	3	2	1	1	5	2	1	3	2		1	1	1	1	1	1	1	0	1	1	2	1	1	4	3	2	2	1	1	2	3	2	2	1	3	3	3	1	3	2	1	0	6	41
253	30	1	3	2	1	1	1	2	2	4	1		0		1	1	2	1	1	2	2	3	3	1	4	3	0	2	2	2	4	4	4	4	3	3	4	4	2	1	3	2	2	1	10	56
254	32	1	3	2	1	1	1	2	2	6	5	Screening	2	1	2	3	3	3	3	3	3	3	4	3	2	4	4	2	2	3	2	4	4	3	3	3	3	2	2	1	4	2	3	1	20	58
255	26	2	1	4	1	1	1	2	2	2	5	Treating team of suspected case	3	1	3	2	3	1	1	3	1	3	3	2	4	1	0	1	4	1	4	4	3	3	4	4	4	2	3	1	3	1	2	1	14	54
256	26	2	1	2	1	1	3	3	5	2	1		0		2	1	2	1	2	3	1	2	2	4	2	4	0	2	1	1	3	4	4	3	3	4	3	2	3	1	3	1	2	1	12	51
257	33	2	3	3	1	1	2	2	2	4	1		0		1	1	1	1	1	1	1	2	3	2	2	1	1	1	1	1	2	3	3	2	3	2	3	3	1	2	2	1	1	0	7	40
258	26	2	1	3	1	1	5	3	5	3	5	I performed a procedure to a patient which was later diagnosed with COVID 19	1	1	1	1	2	1	1	1	1	3	3	2	2	3	0	1	1	1	2	3	3	2	3	3	3	3	4	2	3	1	1	0	8	47
259	37	2	1	4	1	1	5	2	5	16	2		3	3	1	1	1	0	0	3	0	1	1	2	1	1	0	1	1	1	4	3	4	2	3	2	4	2	2	1	4	1	1	0	6	40
260	30	2	3	3	1	1	2	1	5	7	1		0		1	1	1	1	1	2	3	2	3	1	4	1	4	1	2	1	4	4	4	2	4	4	4	4	4	2	4	1	2	1	10	59
261	40	1	3	3	1	1	5	2	5	9	5	Sorting of contacts	6	1	1	0	1	0	0	0	0	1	2	1	1	1	1	1	1	1	2	1	2	1	1	1	2	2	2	1	1	2	0	0	2	26
262	34	2	4	4	1	1	5	3	2	6	4		1	1	3	3	3	3	2	1	3	4	1	2	1	4	0	4	1	2	2	3	4	1	3	3	4	3	4	2	3	1	3	1	18	51
263	29	2	1	2	1	2	3	2	5	6	1		0		3	2	3	2	1	1	1	3	4	1	2	2	0	3	1	1	2	3	4	2	3	2	3	4	4	1	2	1	2	0	13	47
264	26	1	1	3	1	1	1	2	1	2	3		25	4	3	2	2	2	3	2	3	3	3	2	3	3	0	3	3	3	4	4	4	3	2	3	3	4	3	1	3	1	3	1	17	57
265	30	1	1	3	1	1	5	3	5	7	1		0		3	3	3	3	2	3	3	4	3	3	2	2	4	1	2	3	3	3	3	3	4	2	4	3	1	1	4	1	3	1	20	55
266	32	1	3	2	1	1	3	3	5	2	1		0		0	0	0	0	0	0	0	2	1	1	1	1	2	2	1	1	1	2	3	1	3	1	3	1	2	1	1	2	0	0	0	31
267	27	1	1	3	1	1	1	2	2	3	2		1	1	1	1	1	1	0	1	1	2	4	1	2	1	0	1	1	1	1	1	2	1	3	1	3	2	3	1	2	1	1	0	6	33
268	33	1	3	2	1	1	4	2	4	10	2		11	2	1	1	1	0	1	3	3	1	2	1	4	4	4	2	2	1	3	3	2	1	4	2	3	2	2	3	2	2	2	0	10	48
269	31	1	3	2	1	1	3	1	5	9	3		5	2	0	0	1	1	0	0	0	1	2	1	2	4	1	1	2	1	1	1	1	1	1	1	3	3	3	1	3	1	0	0	2	34
270	35	1	1	2	1	1	5	2	5	8	2		5	2	3	1	1	1	1	1	1	1	4	1	2	4	0	1	1	1	2	4	3	2	3	2	2	2	4	1	4	2	1	0	9	44
271	36	1	3	4	1	1	1	1	5	12	5		1	1	2	2	2	2	1	1	1	3	4	1	1	3	2	1	1	3	4	4	4	3	4	3	3	3	3	1	4	2	2	1	11	55
272	38	2	3	3	1	1	5	2	5	11	1		0		1	1	2	1	1	2	1	2	1	2	1	3	3	3	4	2	2	4	4	3	3	3	4	3	3	1	2	1	1	1	9	53
273	27	1	1	3	1	1	5	1	5	4	2		1	1	0	0	0	0	0	0	0	1	1	1	1	1	0	1	1	1	2	1	1	1	1	1	2	1	1	1	1	1	0	0	0	21
274	27	2	4	3	1	1	5	1	1	3	5	Diagnosis,treatment	20	2	1	1	3	2	1	2	1	3	3	2	3	2	0	1	2	2	3	4	3	1	3	3	3	3	4	4	3	1	2	1	11	52
275	29	2	3	2	1	2	5	4	5	3	1		0		1	0	1	1	0	0	1	1	3	2	1	2	4	1	2	2	2	3	3	1	3	2	3	3	2	1	3	1	0	0	4	44
276	30	2	3	3	1	1	2	1	5	4	1		0		0	0	0	0	0	0	0	1	1	1	1	3	1	1	1	1	1	1	1	1	4	1	1	4	1	1	1	1	0	0	0	28
277	29	2	3	3	1	2	1	3	5	3	1		0		0	0	1	2	1	0	1	1	4	1	2	2	0	1	1	2	1	3	3	1	1	1	1	1	1	1	1	2	1	0	5	29
278	27	2	1	2	1	1	1	2	2	4	3		4	4	1	1	1	1	0	1	1	1	3	1	2	4	0	1	1	1	2	3	3	1	2	2	2	1	1	1	3	1	1	0	6	35
279	51	1	3	3	1	1	1	2	5	17	1		0		0	0	0	2	0	0	1	1	4	1	1	4	3	2	1	2	2	4	4	3	4	1	3	3	2	2	3	1	0	1	3	50
280	41	2	3	2	2	1	1	3	5	13	5	Provide anesthesia for covid 19 positive patient	1	1	1	1	3	1	2	1	1	1	1	1	1	4	4	1	2	2	2	3	3	2	3	1	3	1	2	1	2	1	2	0	10	40
281	37	1	3	3	1	1	4	1	4	16	1		0		1	0	1	1	0	1	0	1	2	1	1	3	4	2	1	1	2	4	3	1	2	1	2	2	3	1	2	1	0	0	4	39
282	45	1	3	3	1	1	4	2	4	22	1		0		1	1	1	0	0	3	2	1	2	1	1	3	2	1	1	1	1	1	1	4	2	4	1	2	2	1	3	2	1	0	8	35
283	35	1	3	3	1	1	1	2	5	6	5	Providing anesthesia (including air way management and ventilation to pregnant woman suspected or confirmed case of COVID 19	3	1	3	3	3	1	2	1	1	2	2	2	1	4	1	4	1	1	2	3	2	2	1	2	3	1	1	1	1	1	2	0	14	37
284	34	1	3	2	1	1	1	1	5	6	5	My responsibility is to identifying the suspected cases and transferring them for swabbing	4	4	0	1	1	1	0	0	0	1	4	1	1	2	4	1	1	1	2	3	4	1	2	1	2	1	2	1	2	1	0	0	3	37
285	41	2	4	3	1	1	1	1	5	18	2		1	1	0	0	0	0	0	0	0	1	4	1	1	4	4	1	1	1	1	4	4	1	4	1	4	4	4	1	4	1	0	1	0	50
286	34	1	3	3	1	1	1	2	5	8	3		11	1	3	2	3	3	1	1	1	3	4	1	1	1	4	1	1	1	1	4	3	2	2	4	3	1	2	1	3	1	2	0	14	43
287	35	1	3	2	1	1	1	1	5	10	1		0		1	1	1	0	0	0	1	1	3	1	2	4	4	1	1	1	1	3	4	1	3	1	4	4	2	1	3	2	0	0	4	45
288	29	1	3	3	1	1	3	1	5	5	1		0		1	1	0	1	0	1	0	1	4	1	2	3	2	2	1	4	4	2	3	2	2	2	4	4	1	1	2	2	0	0	4	47
289	36	1	3	2	2	1	2	2	3	15	5	Follow up all Exposed HCW educate them	8	3	3	2	1	1	1	2	1	1	3	1	1	4	4	1	1	1	1	4	4	1	4	2	3	3	3	2	3	2	2	0	11	47
290	45	1	3	2	1	1	3	1	5	22	1		0		3	0	3	3	1	1	1	1	1	1	4	1	2	1	1	2	3	4	4	3	1	4	4	4	1	3	4	1	2	0	12	49
291	50	1	3	2	1	1	3	3	3	23	1		0		1	1	1	1	0	1	2	1	4	1	1	3	3	2	1	1	1	2	3	1	2	1	2	2	2	1	2	1	1	0	7	36
292	27	2	3	2	1	2	4	1	4	1	2		20	2	3	3	3	3	3	3	3	4	4	3	1	1	3	1	1	1	1	4	4	3	4	4	4	1	4	3	4	2	3	1	21	55
293	36	1	3	2	1	1	2	3	2	13	4		3	2	2	1	1	1	1	2	1	2	3	2	4	3	4	3	2	2	4	4	4	2	3	3	3	2	3	1	4	2	1	1	9	58
294	31	2	4	2	1	1	5	2	3	4	5	Respiratory Care	3	3	1	1	1	1	0	1	2	3	4	1	1	1	0	1	1	1	1	2	3	1	2	2	4	3	1	1	4	1	1	0	7	37
295	21	1	1	2	2	1	3	2	5	1	1		0		1	2	3	2	0	2	0	1	2	1	2	3	0	1	1	1	4	4	3	3	1	2	3	1	1	1	3	1	2	0	10	38
296	30	2	1	4	1	1	5	1	5	8	1		0		1	0	0	0	0	1	0	1	3	1	1	2	0	1	1	1	2	1	1	1	1	2	2	1	1	1	1	1	0	0	2	25
297	33	2	3	2	1	1	5	2	2	6	5		1	1	1	0	1	0	0	1	2	1	2	2	1	2	3	1	1	1	3	3	1	1	2	1	2	2	1	1	3	1	1	0	5	34
298	35	2	3	2	2	1	1	2	5	9	1		0		1	1	0	2	0	0	1	2	1	1	4	4	0	1	1	1	1	1	1	2	1	2	3	3	1	1	1	1	1	0	5	32
299	23	2	1	2	1	2	4	5	4	1	1		0		0	0	0	0	0	0	0	1	3	1	1	3	0	1	2	1	1	4	2	1	2	2	4	4	4	1	2	1	0	0	0	40
300	30	1	3	3	1	1	1	2	5	6	5	Dental service	1	1	0	0	1	0	0	1	1	1	4	1	1	3	2	1	1	1	1	2	2	1	2	1	2	2	1	1	1	1	0	0	3	31
301	35	1	3	2	2	1	1	2	1	10	2		1	1	2	1	0	2	2	1	0	2	3	1	1	2	2	1	1	1	2	4	3	1	2	1	3	1	1	1	3	2	1	0	8	36
302	34	2	1	2	1	1	4	2	4	8	1		0		1	1	0	2	1	2	0	3	4	2	1	2	0	1	1	1	3	4	2	3	4	2	3	3	4	1	4	1	1	0	7	48
303	36	2	3	2	1	1	2	3	5	11	4		1	1	3	1	3	3	3	3	3	1	4	2	2	1	0	1	1	1	4	1	1	4	1	4	1	1	1	4	3		3	0	19	38
304	29	2	3	3	1	1	1	1	5	5	2		2	1	1	0	1	0	0	0	0	1	2	1	1	4	1	1	1	1	1	1	1	1	1	1	1	1	1	1	1		0	0	2	24
305	28	1	3	3	1	1	1	2	5	5	5		1	1	0	0	0	0	2	1	2	1	3	2	3	1	2	3	3	3	3	3	3	1	4	2	3	3	2	3	2		1	1	5	50
306	26	2	3	2	1	1	2	6	5	3	5	OR	1	2	1	2	2	2	0	2	1	2	2	2	2	1	3	1	2	2	4	3	3	2	4	2	3	2	4	1	2		2	0	10	47
307	31	2	3	2	1	1	5	3	5	2	1		0		0	3	0	1	1	1	1	3	2	1	2	2	2	1	1	1	1	3	3	1	1	3	1	3	2	2	3		1	0	7	38
308	32	2	4	2	1	2	2	3	5	2	5		3	1	1	1	1	1	0	2	1	1	4	2	3	4	0	1	1	2	1	4	4	1	2	2	2	1	1	2	4	2	1	0	7	42
309	35	1	1	3	1	1	3	2	5	8	5	None	1	1	0	0	0	0	0	0	0	1	1	1	1	1	0	1	1	1	1	4	4	1	2	1	2	2	1	1	2		0	0	0	29
310	22	2	1	4	1	2	5	6	5	27	5		18	3	0	3	1	1	2	3	0	1	4	1	1	2	1	3	4	3	2	3	3	2	3	3	2	2	2	3	2		2	0	10	47
311	29	2	3	2	1	1	2	2	1	5	4		1	1	3	3	3	3	2	2	1	4	3	3	2	3	1	1	2	2	4	4	4	2	3	4	3	3	3	1	4	1	3	1	17	56
312	46	1	3	2	1	1	4	2	3	8	1		0		2	1	2	1	1	1	2	2	3	2	4	2	3	1	2	2	3	3	4	2	1	2	4	4	2	2	3	2	2	1	10	51
313	39	1	3	2	1	1	5	2	2	16	3		1	4	0	1	1	0	2	0	0	1	1	1	1	3	1	1	1	1	1	3	3	1	1	1	4	1	2	1	1	2	0	0	4	30
314	50	1	3	4	1	1	1	3	3	22	3		3	2	1	0	2	0	0	1	1	1	1	1	1	2	0	1	3	2	3	3	3	2	2	3	3	2	2	1	3	2	1	0	5	39
315	29	2	4	2	1	1	2	2	2	8	4		4	1	1	1	3	1	1	1	1	2	4	1	4	4	0	2	1	2	1	3	3	1	1	2	3	1	4	4	3	1	1	0	9	46
316	38	2	1	3	1	1	2	3	5	18	5	Supervisor	20	4	1	1	1	1	0	0	1	1	1	1	1	1	0	3	1	1	1	1	1	1	1	1	1	1	1	2	2	1	1	0	5	23
317	50	1	3	2	1	1	2	3	5	31	2		7	1	0	0	0	0	0	0	0	1	4	1	1	4	4	1	2	3	1	4	4	1	4	1	4	4	4	1	4	1	0	1	0	53
318	58	1	3	3	2	1	1	2	3	16	3		2	3	0	0	0	0	0	0	0	1	1	1	1	1	3	1	1	1	1	1	1	1	1	1	1	1	1	1	1	1	0	0	0	22
319	37	1	3	3	1	1	2	2	5	12	1		0		1	1	1	1	0	1	0	1	1	1	1	1	2	1	1	1	1	2	1	1	1	2	2	1	1	1	1	1	1	0	5	24
320	41	1	3	2	2	1	1	2	3	18	3		30	4	1	3	1	0	2	1	1	4	4	1	4	4	4	1	4	2	1	4	4	1	3	3	2	2	1	1	4	2	1	1	9	54
321	48	1	3	4	2	1	1	3	3	16	3		3	4	0	0	0	0	0	0	0	1	1	1	1	2	1	1	1	1	1	1	1	1	1	1	1	1	1	1	1	1	0	0	0	21
322	42	1	3	3	2	1	1	2	3	20	3		20	3	1	1	1	1	1	1	1	1	3	1	1	4	4	1	2	2	2	4	3	1	3	1	4	3	4	1	4	1	1	0	7	49
323	33	1	1	2	1	1	2	3	2	8	4		10	1	1	0	0	0	0	0	1	1	3	1	1	2	0	1	1	1	1	4	1	1	2	1	3	2	2	1	2	1	0	0	2	31
324	29	2	1	2	1	1	3	1	5	3	1		0		0	0	0	0	0	0	0	1	4	1	1	4	4	1	1	1	1	4	4	1	4	1	4	4	4	1	4	2	0	1	0	50
325	53	2	3	3	1	1	1	1	5	21	1		0		0	0	0	0	0	1	0	2	2	2	1	3	2	2	1	3	2	2	3	1	1	1	2	1	1	1	1	2	0	0	1	34
326	55	2	3	3	1	1	1	3	2	41	1		0		3	1	1	1	1	2	3	2	3	1	4	1	0	1	1	1	2	4	4	2	4	2	2	1	1	1	4	1	2	0	12	41
[truncated: 3 more columns]
